# Supplementary material for: Lignosulfonic Acid Sodium Is a Noncompetitive Inhibitor of Human Factor XIa
Source: MDPI journal article supplement (doi:10.3390/ph14090886), 2021-08-31

## Lignosulfonic Acid Sodium (LSAS) is Noncompetitive Inhibitor of Human Factor XIa

Srabani Kar,<sup>1</sup> Page Bankston,<sup>1</sup> Daniel K Afosah,<sup>2</sup> Rami A. Al-Horani<sup>1\*</sup>

<sup>1</sup>*Division of Basic Pharmaceutical Sciences, College of Pharmacy, Xavier University of Louisiana,  
New Orleans LA 70125 USA*

<sup>2</sup>*Department of Chemistry and Biochemistry, Washington and Lee University,  
Lexington VA 24450 USA*

**Table S1.** Effects of known molecular entities on APTT and PT in normal as well as deficient human plasmas.

| Anticoagulants                      | APTT (EC <sub>50</sub> ) <sup>a</sup>   | PT (EC <sub>50</sub> ) <sup>a</sup> |
|-------------------------------------|-----------------------------------------|-------------------------------------|
| LSAS (under investigation)          | 308.8 ± 23.9 <sup>b</sup> µg/mL         | 980.1 ± 145.0                       |
| UFH (AT activator)                  | 0.68 µg/mL<br>(AT Def. =10.1 µg/mL)     | 2.53 µg/mL                          |
| Argatroban HCl (Thrombin inhibitor) | 0.29 ± 0.02 µM                          | 0.34 ± 0.04 µM                      |
| Rivaroxaban (FXa inhibitor)         | 0.12 ± 0.003 µM                         | 0.18 ± 0.05 µM                      |
| Anti-F11 (FXIa inhibitor)           | 1.99 µg/mL<br>(FXI Def. >>3.6 µg/mL)    | >>3.6 µg/mL                         |
| C6B7 (FXIIa inhibitor)              | ~0.05 µg/mL<br>(FXII Def. >>0.06 µg/mL) | >>0.06 µg/mL                        |

<sup>a</sup> The effective concentration to double the clotting time in the corresponding assay; <sup>b</sup> Error represents ± 1 SE. APTT: Activated partial thromboplastin time; PT: Prothrombin time; AT: Antithrombin.

**Figure S1.** Absorbance of LSAS solution prepared in FXIa buffer (which contains 0.02% Tween80) showing no aggregation at the highest concentration tested.

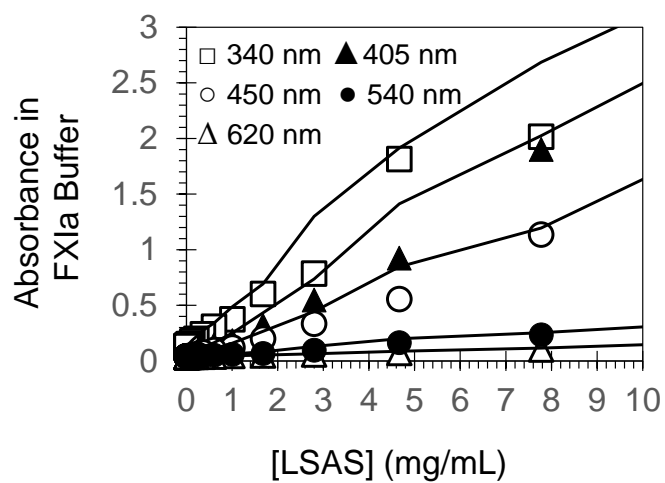

Supplement: s1 [file s1]
